# Supplementary material
Source: publisher figshare collection journal article supplement (https://geolsoc.figshare.com/ndownloader/files/5420951)
Supplement: Supplementary file 1 [file 5420951]

	Time bin (~stage)	Stage duration (Walker & Geissman 2009)	Non-marine area (Smith et al. 1994)	Sea level (Haq et al. 1987)	Fossiliferous marine formations (sampling)	Open ocean TDE	Shallow marine TDE	Total TDE
1	Induan/Olenekian	6	135		63	0	8	8
2	Anisian	4	139	1.77	75	0	60	60
3	Ladinian	6	139	21.49	70	0	47	47
4	Carnian	7	134	50.44	97	1	22	23
5	Norian	24	134	10.72	64	2	5	7
6	Rhaetian	2.4	134	15.26	48	3	3	6
7	Hettangian	4.6	150	15.13	35	10	0	10
8	Sinemurian	7	146	35.63	39	13	0	13
9	Pliensbachian	7	142	51.03	48	2	0	2
10	Toarcian	7	139	49.57	34	26	5	31
11	Aalenian	4	138.5	77.17	16	0	0	0
12	Bajocian	4	138	94.2	48	4	1	5
13	Bathonian	3	133	54.31	46	0	9	9
14	Callovian	4	128	60.95	60	16	10	26
15	Oxfordian	5	132	107.31	92	4	5	9
16	Kimmeridgian	5	130	140.56	51	10	12	22
17	Tithonian	5.5	130	113.96	79	12	13	25
18	Berriasian	5.5	127	133.24	57	1	1	2
19	Valanginian	4	127	84.15	77	1	5	6
20	Hauterevian	6	125	90.9	55	1	1	2
21	Barremian	5	125	160.78	55	4	0	4
22	Aptian	13	131	154.5	108	8	0	8
23	Albian	12.4	129	187.22	163	24	0	24
24	Cenomanian	6.1	118	225.98	114	15	26	41
25	Turonian	4.2	121	226.75	87	12	15	27
26	Coniacian	3.5	118	230.75	47	6	6	12
27	Santonian	2.3	118	214.61	62	11	15	26
28	Campanian	12.9	110	224.14	146	26	31	57
29	Maastrichtian	5.1	109	195.04	130	20	38	58
